# Supplementary material
Source: MDPI journal article supplement (https://www.mdpi.com/2073-4352/13/1/56)

Table S1. Previously potentiometrically determined stability constant values for Sm and Eu complexes with tda. Overall formation constants are included in the table for each corresponding species.

| Ln | Conditions                       | [LnL] <sup>+</sup> | [LnL <sub>2</sub> ] <sup>-</sup> | [Ln(HL)] <sup>2+</sup> | [LnL(HL)] | Reference |
|----|----------------------------------|--------------------|----------------------------------|------------------------|-----------|-----------|
| Sm | 0.15 M NaClO <sub>4</sub> , 37°C | 3.455              | 5.72                             | 6.26                   |           | 1         |
| Sm | 1.00 M NaClO <sub>4</sub> , 25°C | 2.9                | 4.68                             | 5.59                   | 7.82      | 2         |
| Eu | 6.60 M NaClO <sub>4</sub> , 25°C | 3.54               |                                  |                        |           | 3         |
| Eu | 1.00 M NaClO <sub>4</sub> , 25°C | 2.796              | 4.17                             |                        |           | 4         |

1. J. Torres, C. Kremer, E. Kremer, S. Domínguez, *Inorg. Chim. Acta*, 355 (2003) 175
2. I. Delliën, I. Grenthe, G. Hessler, *Acta Chem. Scand.*, 27 (1973) 2431
3. P. Thakur, P. N. Pathak, T. Gedris, G. R. Choppin, *J Solution Chem*, 38 (2009) 265
4. N. P. Bessen, I. A. Popov, C. R. Heathman, T. S. Grimes, P. R. Zalupski, L. M. Moreau, K. F. Smith, C. H. Booth, R. J. Abergel, E. R. Batista, P. Yang, J. C. Shafer, *Inorg. Chem.*, 60 (2021) 6125

Table S2. Typical bond distances Ln-S found in structures containing Ln(III) ions and thiol ligands.

| Ln | Ligand                                         | Bond distance (Å) | Reference |
|----|------------------------------------------------|-------------------|-----------|
| La | 1,4,10,13-tetraoxa-7,16-dithiacyclo-octadecane | 3.045             | 1         |
| La | 1,4,10,13-tetraoxa-7,16-dithiacyclo-octadecane | 3.031             | 1         |
| La | 1,4,7-trithiacyclononane                       | 3.064             | 2         |
| La | 1,4,7-trithiacyclononane                       | 3.089             | 2         |
| La | 1,4,7-trithiacyclononane                       | 3.126             | 2         |
| Sm | tda                                            | 3.122             | 3         |
| Dy | tda                                            | 3.091             | 4         |
| Dy | tda                                            | 3.099             | 4         |
| Gd | tda                                            | 3.098             | 4         |
| Ce | tda                                            | 3.153             | 5         |
| Nd | tda                                            | 3.148             | 6         |
| Ce | tda                                            | 3.290             | 7         |
| Ce | tda                                            | 3.144             | 7         |
| Eu | tda                                            | 3.1050            | 8         |

1. M. Ciampolini, C. Mealli, N. Nardi, *J. Chem. Soc., Dalton Trans.*, (1980) 376
2. L. Karmazin, M. Mazzanti, J. Pécautb, *Chem. Commun.*, (2002) 654
3. X. Hou, D. Li, X. Wang, J. Wang, Y. Ren, M. Zhang, *Chin. J. Chem.*, 27 (2009) 1481.
4. H. R. Wen, P. P. Dong, F. Y. Liang, S. J. Liu, X. R. Xie, Y. Z. Tang, *Inorg. Chim. Acta*, 455 (2017) 190.
5. F. Hosseinabadi, M. Ghadermazi, M. Taran, Z. Derikvand, *Inorg. Chim. Acta*, (2016) 443, 186.
6. T. Malmborg, A. Oskarsson, *Acta Chem. Scand.*, 27 (1973) 2923.
7. M. Ghadermazi, M. M. Olmstead, S. Rostami, J. A. Gharamaleki, *Acta Crystallographica Section E: Structure Reports Online*, 2011, 67, m291.
8. H. S. Wang, W. J. Bao, S. B. Ren, M. Chen, K. Wang, X.-H. Xia, *Anal. Chem.* 87 (2015) 6828

Figure S1. Species distribution diagram of the Eu-tda system at 25.0 °C,  $I = 0.15 \text{ mol}\cdot\text{L}^{-1} \text{ NaClO}_4$ . Left:  $[\text{Eu}^{3+}] = 1 \text{ mM}$  and total  $[\text{tda}] = 1 \text{ mM}$ . Right:  $[\text{Eu}^{3+}] = 1 \text{ mM}$  and total  $[\text{tda}] = 3 \text{ mM}$

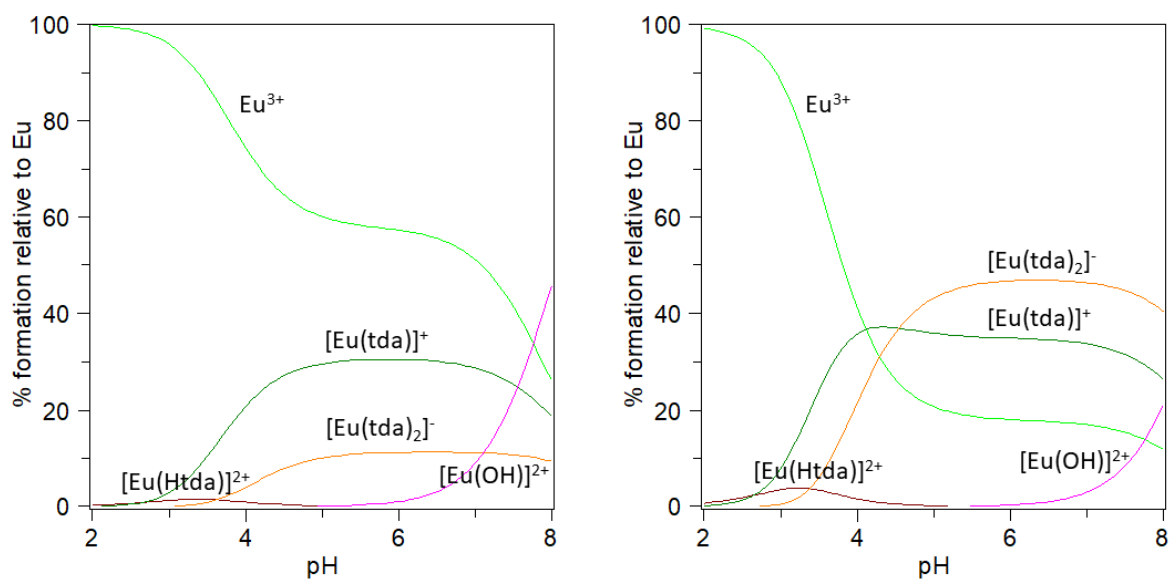

Figure S2. IR spectra of complexes **1** (blue line) and **2** (red line), together with the protonated ligand  $\text{H}_2\text{tda}$  (green line) for comparison.

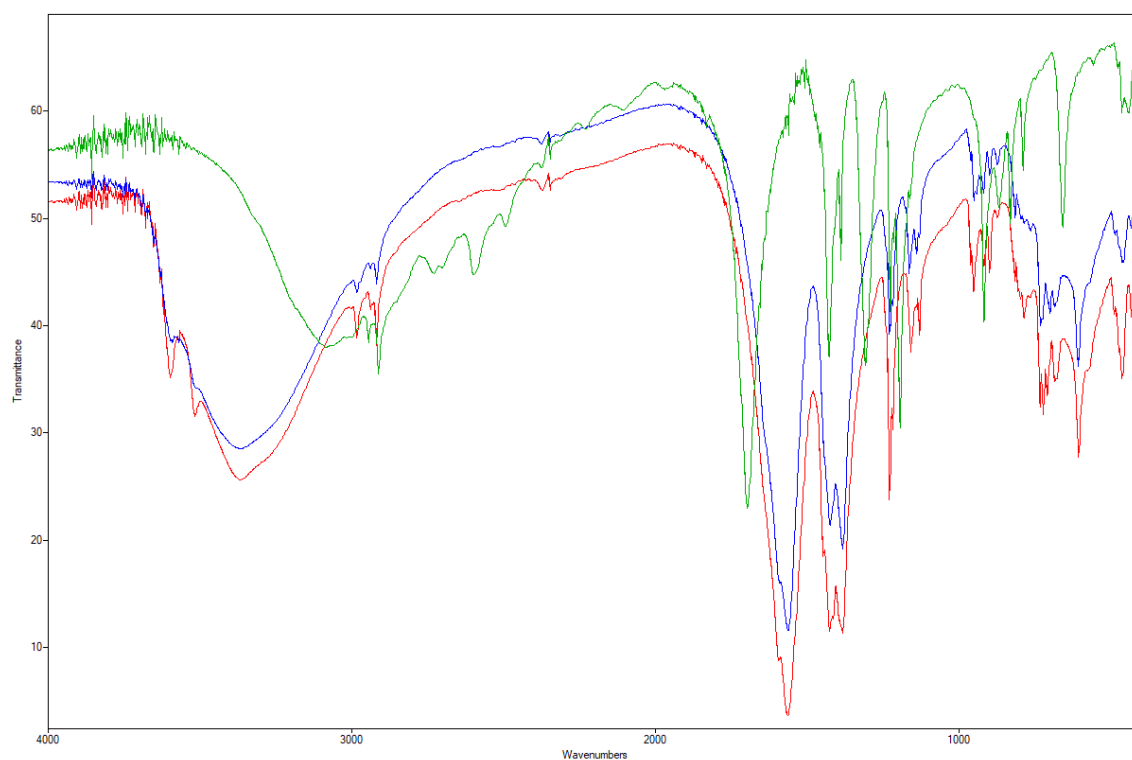

Figure S3. Polyhedra around the Sm(III) ions in **1**. Symmetry codes <sup>i</sup>1-x,-y,1-z; <sup>ii</sup>-x,1-y,-z; <sup>iii</sup>1-x,1-y,-z; <sup>iv</sup>-1+x,+y,+z.

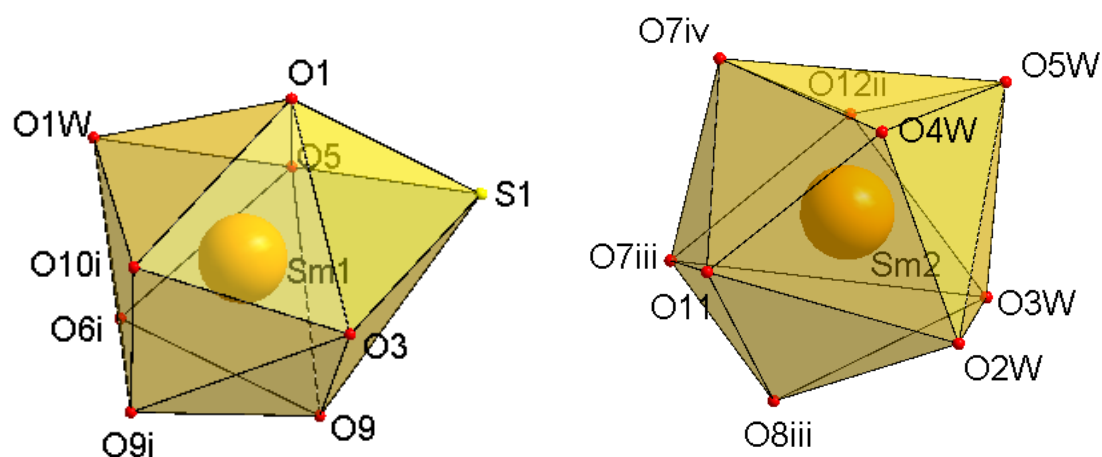

Figure S4. Left: solid-state excitation spectra. Right: emission spectra of compound **1** excited at 392 nm (excitation at 349 nm gave place to a higher baseline that prevented the observation of the Sm emission profile) and using an excitation slit of 10 nm. Transitions assigned to each band are also shown.

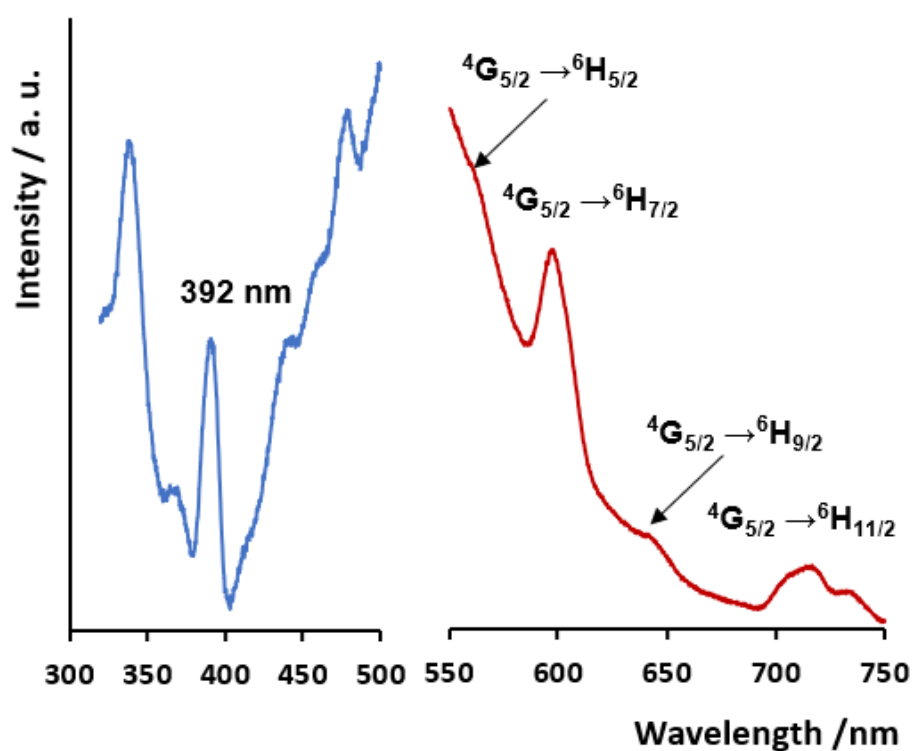

Supplement: s1 [file s1]
